# Supplementary material for: Morphometric evidence challenges delta interpretation of Jezero Crater’s channel network
Source: Research Square preprint supplement (doi:10.21203/rs.3.rs-6221796/v1), 2026-01-13
Supplement: Supplementary file 1 [file 84765323ad9039480b5e6d7a.docx]

| **Testing for** | ***Normality***  *< .05, not normal* | |
| --- | --- | --- |
| **Test** | Shapiro-Wilkes | Kolmogorov-Smirnov |
| Eberswalde | p < 0.05 | p < 0.05 |
| Jezero | p < 0.05 | p < 0.05 |
| Deltas | p < 0.05 | p < 0.05 |
| Fluvial Fans | p < 0.05 | p < 0.05 |

**Table 5. Tests for channel length normality**

| **Testing For** | ***Variances***  *< .05, not similar* | ***Means***  *< .05, not similar* |
| --- | --- | --- |
| **Test** | Levene’s | Welch’s T-test |
| Eberswalde-Jezero | p < 0.05 | p < 0.05 |
| Eberswalde-Delta | p < 0.05 | p < 0.05 |
| Eberswalde-Fluvial Fan | p < 0.05 | p < 0.05 |
| Jezero-Delta | p < 0.05 | p < 0.05 |
| Jezero-Fluvial Fan | p < 0.05 | p < 0.05 |

**Table 6. Tests for channel length variance and similarity of means**

| **Testing for** | ***Normality***  *< .05, not normal* | |
| --- | --- | --- |
| **Test** | Shapiro-Wilkes | Kolmogorov-Smirnov |
| Eberswalde | p > 0.05* | p < 0.05 |
| Jezero | p > 0.05* | p < 0.05 |
| Deltas | p < 0.05 | p < 0.05 |
| Fluvial Fans | p < 0.05 | p < 0.05 |

**Table 7. Tests for angle normality**

**Table 8. Tests for angle variance and similarity of means**

| **Testing For** | ***Variances***  *< .05, not similar* | ***Means***  *< .05, not similar* |
| --- | --- | --- |
| **Test** | Levene’s | *Independent* or Welch’s T-test |
| Eberswalde-Jezero | p < 0.05 | p < 0.05 |
| Eberswalde-Delta | p < 0.05 | *p > 0.05* |
| Eberswalde-Fluvial Fan | p > 0.05 | p < 0.05 |
| Jezero-Delta | p > 0.05 | p < 0.05 |
| Jezero-Fluvial Fan | p < 0.05 | *p > 0.05* |
